# Supplementary material
Source: PubMed Central journal article supplement (PMC3269770)
Supplement: supp_WNL.0b013e318212a89f_gong.pdf [file supp_WNL.0b013e318212a89f_gong.pdf]

# Az idegi őssejtek, a progenitor sejtek és glioma őssejtszerű sejtek különböző kemoterápiás érzékenysége

Xing Gong, MD  
Philip H. Schwartz, PhD  
Mark E. Linskey, MD  
Daniela A. Bota, MD, PhD

Larva és cím:  
Dr. Daniela A. Bota,  
UC Irvine Medical Center,  
101 The City Drive South,  
Stanton Hall, Suite 121,  
Orange, CA 92668  
dbota@uci.edu

## KIVONAT

**Célkitűzések:** Az új adatok alapján feltételezhető, hogy a glioma őssejtszerű sejtek (GSC, glioma stem-like cell), valamint az idegi őssejtek és progenitor sejtek (NSC, neural stem/progenitor cell) eredete közös lehet. Míg a GSC-k segítik a daganatos proliferációt és ellenállóak a klasszikus kemoterápiás kezelésekkel szemben, a kezelés NSC-ken kifejtett hatásával kapcsolatban kevés vizsgálat történt. Mivel egyre ismertebb az NSC-k szerepe a tanulásban és a memóriában, szükség van olyan gyógyszerek kifejlesztésére, amelyek csökkentik a neurotoxicitást, de hatásosak a gliatomorok ellen.

**Módszerek:** Vizsgálatunkban három humán NSC-tenyészetet és többszörös alacsony és magas grádusú GSC-tenyészetet kezeltünk olyan gyakran használt készítményekkel, mint a temozolomid (TMZ), a cisplatin (CIS), valamint két új, ígéretes szerrel: a proteaszómagátó bortezomibbal (BTZ) és az epidermalis növekedési faktor receptor tirozinkináz-gátló erlotinibbel (ERL). A sejtek túlélését, osztódását, sejthalál-indukciót, továbbá gyógyszerrezisztencia-markereket vizsgáltunk.

**Eredmények:** A TMZ csökkentette az NSC életképességét, miközben csak minimálisan befolyásolta a GSC-eket. A TMZ serkentette az NSC pusztulását, amelyet a megnövekedett proliferáció részben kompenzált. A CIS által kifejtett hatások hasonlóak voltak. Az NSC érzékenysége a TMZ- és a CIS-szerekkel szemben összefüggést mutatott a multidrogrezisztens ABCG2 gén alacsony expressziójával, de az MGMT vagy az MSH1/MLH2 génnel nem állt kapcsolatban. A BTZ a GSC-k szintjének 80%-os csökkentését eredményezte, míg az NSC-k szintjét csak minimálisan befolyásolta. BTZ-kezelést követően a GSC-kben alacsonyabb proteaszómaszintet és -aktivitást figyeltünk meg. Az ERL-kezelés szintén csökkentette a GSC számát, de nem befolyásolta az NSC életképességét, amely összhangban áll azzal, hogy NSC-k esetén az EGFR-expresszió a GSC-kkel szemben alacsonyabb.

**Következtetések:** Az ERL és a BTZ új kemoterápiás szerként hatékony a GSC-kkel szemben, de NSC-ken minimális hatást fejt ki, míg egyéb hosszabb ideje alkalmazott készítmények, mint a TMZ és a CIS toxikusabbak NSC-ken, mint a GSC-kkel szemben. Szelektívbb gyógyszerek felismerése és vizsgálata mindenképpen indokolt.

**Eredeti megjelenés:** *Neurology*® 2011;76:1126–1134.

## RÖVIDÍTÉSEK

**BTZ** – bortezomib; **CIS** – cisplatin; **ERL** – erlotinib; **GSC** – (glioma stem-like cell) glioma őssejtszerű sejt; **MGMT** – metil-guanin metil-transferáz; **NSC** – (neural stem/progenitor cell) idegi őssejt és progenitor sejt; **TMZ** – temozolomid.

Az Amerikai Egyesült Államokban évente 22 000 embernél diagnosztizálnak primer agydaganatot.<sup>1</sup> A betegek életminőségét korlátozza a kezelés által kiváltott tanulás és memóriát érintő képességek hanyatlása<sup>2–4</sup> a kognitív funkciókért felelős területek érintettsége miatt. Ezek a korlátozások azoknál a daganatos betegeknél jelentkeznek, akik kemoterápiás kezelést kapnak, de agyi besugárzást nem.<sup>5</sup>

Az agydaganat kezelésére számos szer létezik. A neuroonkológiában gyakran használt temozolomid (TMZ) és a glioma másodvonallbeli kezelésekor alkalmazott cisplatin (CIS) magas koncentrációt ér el az agyban.<sup>6,7</sup> A TMZ egy DNS-alkiláló szer, míg a CIS a DNS-ből platinatartalmú termékeket képez. A TMZ-rezisztencia a metil-guanin metil-transferáz (MGMT) magas szintje miatt alakul ki.<sup>8</sup> A CIS-rezisztencia az MLH1 és az MSH2<sup>9</sup> mismatch repair enzimek inaktivációjával és a multidrog-rezisztenciáért felelős fehérjék, különösen az ABCG2 fehérje overexpressziójával függ össze.<sup>10</sup> Két további vegyületcsalád az epidermalis növekedési faktor-receptor tirozinkináz-gátlók (erlotinib [ERL])<sup>11,12</sup> és a proteaszómagátók preklinikai tesz-

Kiegészítő adatok  
a [www.neurology.org](http://www.neurology.org)  
honlapon találhatóak

*Nyomatás és elektronikus formában 2011. június 23-án jelent meg a [www.neurology.org](http://www.neurology.org) honlapon.*

*Magyarul fordította:* Departments of Neurology (X.G., D.A.B.) és Neurological Surgery (M.E.L., D.A.B.), UC Irvine School of Medicine, Orange; Children's Hospital of Orange County Research Institute (P.H.S.), Orange; Chao Family Comprehensive Cancer Center (M.E.L., D.A.B.), Irvine, CA.

*A vizsgálat anyag hátterének leírása:* Az alapítóját D. Bota számára a University of California, Irvine és a Children's Hospital of Orange County biztosította a National Human Neural Stem Cell Resource forráson keresztül.

*Érdeklődők:* A szerzők érdeklődésűi a cikk végén olvashatók.

teken jól szerepeltek, és kis vizsgálatokban hatásosnak bizonyultak.

Az összejt-populációk a daganat viselkedése szempontjából és a kognitív funkciókat illetően egyaránt fontosak. A glioblastomasejtek egy alpopulációja – a glioma összejtszerű sejtek (GSC, glioma stem-like cells)<sup>16</sup> – az idegi összejtségeket és progenitor sejteket (NSC, neural stem/progenitor cells) kimutató markerekkel szemben pozitív.<sup>13,18</sup> A GCS-ek nem érzékenyek sem a sugárkezelésre,<sup>19</sup> sem a TMZ-, karboplatin-, paclitaxel- vagy etoposidkezelésre.<sup>20</sup> Azonban egyelőre nem ismert az ERL-lel vagy BYZ-vel szemben mutatott érzékenységük a nem GSC-tumoros sejteket vagy az NSC-eket illetően. Hízel szemben az NSC-k felnőttkorban is megmaradnak.<sup>21</sup> A neurogenesis a tanulásban<sup>22</sup> és a memóriában<sup>23</sup> egyaránt fontos szerepet játszik. A sugárkezelés,<sup>24</sup> a carmustin, a CIS és az 5-fluorouracil is toxikus patkány-NSC-ekre.<sup>25</sup> A kemoterápia emberi NSC-ekre kifejtett hatásai nem ismertek.

**MÓDSZEREK** **Standard protokoll jóváhagyása, bejegyzése és a bejegyzések bejegyzése.** Az IRB-engedély mind a Kaliforniai Egyetem Irvine-i Gyógyászati Központja, mind az Orange megyei Gyermekkórház esetén rendelkezésre állt.

**A sejtek izolálása és tenyésztése.** Az NSC-k (SC23, SC27, SC30) koraszülöttektől származtak, tenyésztésük a korábban ismertetett módon történt.<sup>26</sup> A Hu/YuP01 glioblastoma multiforme sejteket dr. David Paschalis (Children's National Medical Center),<sup>27</sup> a DS4-MG és az U251 stabil sejtonalakat dr. Darrell Bigner (Duke) ajándékozta a vizsgálatunknak. A friss agytumorokat (alacsony és magas grade) sebészileg eltávolították, majd neuropatológusok lelezték (lásd e-1 táblázat a *Neurology*<sup>®</sup> www.neurology.org weboldalon). A sejtek tenyésztése matrigel-le bevont edényekben történt 1:1 DMEM/F12 tápoldatban (Irvine Scientific), 10% B27 (Stem Cell Technologies), 292 g/ml glutám (Irvine Scientific), 40 ng/ml bFGF, 20 ng/ml EGF és 20 ng/ml PDGF mellett. A növekedéshez e közegek felül másnaponként lecserélték és hűtőszekrényben, vagy ha összefüggővé vált, nem ezimotikus sejtszaporító oldattal (Sigma) passzolták. Vizsgálatunkban minden GSC tenyésztése a korábban publikált módon történt.<sup>27</sup> A GSC-k, az NSC-hoz hasonlóan, nem lezáródó felületen gömböket képeznek, normoxiás környezetben (20%-40%) a CD133+ magas sejtfelületi expressziója figyelhető meg. Mindemellett, ha a GSC-k a gliális differenciációnak kedvező környezetben nőnek, GFAP+, amelyben az idegi differenciációnak kedvező körülmények közt kerülnek β-3-tubulint expresszálnak, így az a multipotens tulajdonságukat.

**Sejtproliferációs analízis.** A sejtproliferációs arányokat BrdU inkorporációs módszerrel vizsgáltuk. A TMZ- vagy CIS-kezelést követően harmadik és hetedik napon a sejteket BrdU-módszerrel, 24 óra közötti inkubációval, majd fixálással. Monoklonális anti-BrdU-antitestet adunk hozzá, majd tetrametilbenzidin-környékű másodlagos antitestet. A tetrametilbenzidin-átalakulást 450 és 540 nm-es hullámhosszon Spectra Max 250 Plate Reader kísérővel mértük.

**A sejthalál mérésének meghatározása.** A nekrotikus sejthalál propidium jodid festéssel határoztuk meg.<sup>28</sup> A sejteket begyűjtöttük, propidium jodiddal (5 µg/ml) inkubáltuk és flow citometria segítségével elemeztük.

**Génextpressziós analízis.** Az RNS-t Trizol (Invitrogen) segítségével izoláltuk és cDNA-t szintetizáltunk SuperScript<sup>®</sup> cDNA Synthesis kit (Invitrogen) használatával. Sorozatos PCR-reakciót (SYBR Green Master Mix, Qiagen) végeztünk az MGMP1, MSH1, MLH2, ABCG2 és a proteasóma 5-, 6- és 7-β-alegységek (PSMB5, PSMB6 és PSMB7) szintjének meghatározására BioRad

C100 Cycler segítségével. A szinteket aktinra normalizáltuk. A használt alapelvek (e-2 táblázat) specifikusságát minden PCR végződéskor diszociációs görbe-analízissel ellenőriztük meg.

**Apoptózisanalízis.** Az NSC-eket és a GSC-eket a kontrollcsoporthoz hasonlóan nem kezeltük, egyéb esetekben BYZ-vel kezeltük. Röviddel a kezelés után 50 µmol/l kaszopá-3-gátló Z-VAD-FMK-t (Enzyme Systems) adtuk. A kaszopá-3-aktivitást Fluorometric Assay kit (MBL) segítségével mértük; 10<sup>6</sup> sejtet 24 órával a BYZ- (5 nmol/l) kezelés és a ZVAD (50 µmol/l) után gyűjtöttük be, a megdöltöknél megfelelően, centrifugálással pelletet képeztünk, majd sejtoldó közegben szuszpendáltuk. Összesen 200 µg fehérjéséj-kivonatot inkubáltunk 200 µmol/l DEVD-pNA-val. Az EVD-pNA detektálása spektrofotometriával történt 380 nm gerjesztés és 460 nm emisszió mellett. Az eredmények a kontrollmintákhoz viszonyítva szinálisan szerepelnek. Az eredményeket hat független mérés átlagaként ± standard hiba adtuk meg.

**Proteasómaaktivitás mérése.** 20S proteasóma kromotrip-szimozim aktivitását mértük 20S proteasómaaktiváló kit (Proteasome Activity Kit – Millipore) segítségével. Röviddel, a BYZ-vel kezelt vagy kontroll-NSC-eket és GSC-eket négy órával a kezelést követően begyűjtöttük, centrifugálással pelletet képeztünk, majd sejtoldó közegben szuszpendáltuk. Összesen 200 µg fehérjéséj-kivonatot inkubáltunk két órával kaszopá-3 (felkötő folyadék) SucLLVY-AMC proteasómaaktivátorral. A fluoreszcenciát 380/460 nm-es szinálrendszernél mértük.

**Immunhisztokémia.** A sejteket 10%-os puffertel formalinnal fixáltuk, antigénretardáló citirapufferben (Antigen Retrieval Citra Buffer – Biogenex) előkezeltük és 3%-os hidrogén-peroxid, avidin-biotin komplex zárolást követően immunoperoxidáz reakciókat végeztünk egy EGFR-antitest (Invitrogen) felhasználásával. A reakciókat biotinilált kecske anti-egyirmunglobulin-G másodlagos antissal, majd egy avidin-biotin peroxidáz komplexszel folytattuk. Pozitív kontrollként egyszójasz emulziót szolgált.

**Statistikai analízis.** A grafikonok és a statisztikai elemzések Prism 3.03 (Graph Pad) programmal készülték. Minden érték átlag ± SE formájában jelenik meg. A szignifikanciát egyező p-értékkel vagy varianciaanalízissel vizsgáltuk.

**EREDMÉNYEK** **A humán NSC in vitro sokkal érzékenyebb TMZ-kezelésre, mint a magas vagy alacsony grádusú GSC.** Három NSC-tenyészetet és több, alacsony és magas grádusú gliális tumorokból származó GSC-tenyészetet kezeltünk TMZ-vel. Célunk a TMZ-kezelés első vonalbeli hatásainak in vitro kimutatása alacsony és magas grádusú gliális tumorok esetén. Azt tapasztaltuk, hogy az NSC-k sokkal érzékenyebbek a terápiás dózisú TMZ-re (a tenyészetekben az NSC-k száma 50%-kal csökkent a kontrollhoz képest hét nappal a 50 µmol/l TMZ-kezelés után) (1A ábra), mint a GSC-k. Hasonló dózisú TMZ a GSC-k kezelése esetén nem vezetett a sejtszám csökkenéséhez. Ezt a jelentős megfigyelést három darab NSC-, két darab alacsony grádusú GSC- és három darab magas grádusú gliómából származó GSC-tenyészetben is megerősítettük (1B ábra).

**Az alacsony dózisú TMZ serkenti az NSC osztozását a magas dózissal ellentétben, míg a GSC proliferációjára dózistól függetlenül nincs hatással.** Az NSC számának csökkenését befolyásoló tényezők vizsgálatára a BrdU inkorporációs módszer alapján becsültük meg a sejtproliferációt. Az alacsony dózisú TMZ (50–200 µmol/l) jelentősen fokozta az NSC-k osztozási arányát a kezelést követő harma-

1. ábra A humán idegi őssejtek és a progenitor sejtek (NSC) érzékenyebbek a temozolomid- (TMZ-) kezelésre, mint a glioma őssejtzerű sejtek (GSC)

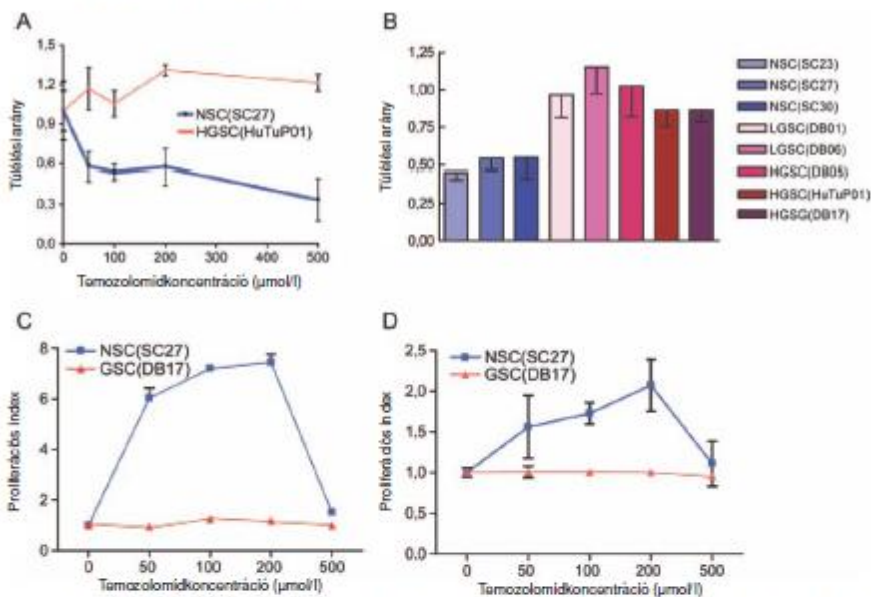

(A) Elsővelő dózisú in vitro TMZ-kezelés az NSC-k számszámának csökkentéséhez vezet (SC27), miközben a GSC-ket minimálisan befolyásolja (HuTuP01). (B) 200 µmol/l TMZ-kezelés az idegi őssejtek 50%-át elpusztítja (SC23, SC27 és SC30). Ugyanannak a dózisnak alacsony (DB01, DB06) és magas (DB05, DB17, HuTu) grádusú GSC-k esetén kisebb a toxicitása. (C) Az NSC sejtek növekedése (indú) intenzitása növekedési mértékének maximum nyolcszoros magasabb három nappal az alacsony dózisú TMZ-kezelést követően, de a kezelést követő hetedik napon alacsonyabb szintre tér vissza. (D) Hét nappal a TMZ-kezelés után a GSC-k proliferációjában nem látható az ignifókára hatás.

dék napon – az nyolcszoros magasabb volt, mint a nem kezelt sejtek osztódási aránya. Azonban a magasabb dózisú TMZ (500 µmol/l) kisebb növekedéshez vezetett – csupán 50%-os a nem kezelt sejtekhez képest (1C ábra). Az osztódási arányban megfigyelt növekedés időben korlátozott volt: hét nappal a TMZ-kezelés után az NSC proliferációs arány elérte a maximumát, amely az alapszint kétszerese volt (1D ábra). A TMZ-kezelésnek csak minimális hatása volt GSC-k esetén: a proliferációban gyenge, 25%-os növekedés jelentkezett a kezelés után három nappal, míg a hetedik napon az osztódás az alapszintre állt vissza (1C és 1D ábra).

**A TMZ NSC-kben sejthalált indukál, de GSC-kben nem.** A sejtszám csökkentésének másodlagos oka lehet a fokozott sejtpusztulás vagy a csökkent proliferáció. Mivel a TMZ-kezelés csak az NSC proliferációját növelte, a GSC osztódását nem, úgy döntöttünk, hogy meghatározzuk a TMZ által kiváltott sejthalált GSC esetén a propidium jodid (PI, propidium iodide), egy nekrotikus sejthalálmarker beépülésének mérésével (2A ábra). Érdekes módon hét nappal a TMZ-kezelést követően az 500 µmol/l dózisban részesülő NSC-k 25%-a, míg a 200 µmol/l dózisban részesülő NSC-k 17%-a mutatott pozitív PI-festődést. A PI beépülése a GSC-kbe ugyanolyan volt a két kezelési csoportban és a kontrollcsoportban. Mindez

megegyezte az a feltevés, hogy ez a tumorsejt-populáció rezisztens a TMZ-kezeléssel szemben.

**A TMZ-rezisztenciát kimutató MGMT enzim szintje az NSC és a GSC esetén hasonlóan magas volt.** Az MGMT a leggyakrabban használt TMZ-rezisztenciát jelező marker; a magas MGMT-szint a TMZ-kezelésre adott gyenge választ valószínűsíti.<sup>6</sup> Ezért az MGMT-expressziót három NSC-, 11 magas és alacsony grádusú gliomától származó GSC-tenyészetben és két stabil gliomasejtvonalon mértük meg. Az eredmények azt mutatják, hogy mind az NSC-k, mind a GSC-k esetén hasonlóan nagyon magas az MGMT-expresszió a stabil sejtvonalakhoz viszonyítva, amely arra utal, hogy az MGMT-expresszióban jelentkező különbségek nem magyarázzák a TMZ-kezelésre adott válaszok különbözőségét (2B ábra).

**Humán NSC-k in vitro környezetben érzékenyebbek a CIS-re, mint a GSC-k.** A CIS igen gyakran használt másodikvonalbeli kezelés a glioma terápiajában és első vonalbeli lehetőség gyermekkori központi idegrendszeri daganatok esetén (például medulloblastoma). Két NSC- és több GSC-tenyészetet kezeltünk cisplazinnal (representatív adatok mutatják). A cisplazinnak számos súlyos hatása van az idegi őssejtekre és progenitor sejtekre: még a nagyon kis dózisú CIS (0,5 µmol/l) is a sejtszám 50%-os csökkentéséhez vezethet a tenyészetekben a

2. ábra A temozolomid (TMZ) sejteltölt indukál egy metil-guanin metil-transferáz (MGMT) független mechanizmus által az idegi őssejtekben és progenitor sejtekben, de a glióma őssejtszerű sejtekben (GSC) nem

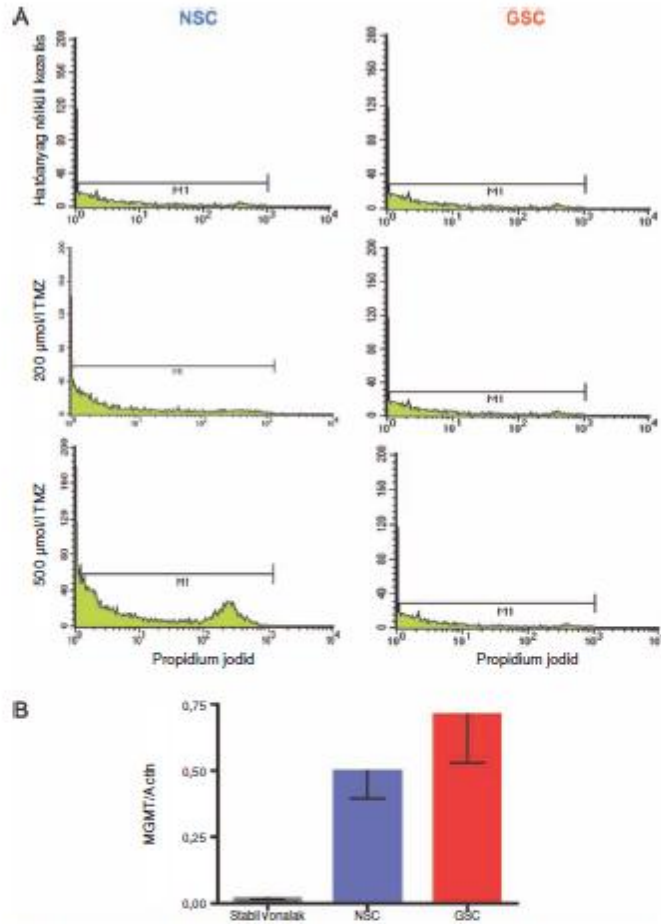

A) Három nappal a TMZ-kezelés után, az 500 μmol/l TMZ-vel kezelt NSC-k (SC23) 25%-a, a 200 μmol/l TMZ-vel kezelt NSC-k 17%-a mutatott pozitív P1-fehérítést flow citometriával, magasabb membránpermeabilitás miatt, utalva a nekrotikus sejthalálra, míg a GSC-ek (DB 17) nem volt hatékonyak. (B) Az NSC-ekhez a GSC-ekhez hasonló arányú genetikai expressziója, amelyek a TMZ-kezelés alatt felelősek (MGMT), de az expresszió szintje magasabb, mint a stabil gliómasejtvonalakban. Az adatok három darab NSC-, 11 darab GSC-tenyésztés és 10 darab stabil gliómasejtvonal állagából származnak.

kezelés után három nappal, miközben 5 μmol/l dózisban hatékonyan elpusztítja ezeket a sejteket (3A ábra). Ezzel szemben, az alacsony dózisú CIS nem csökkentette a GSC-k számát, és a magas dózis (10 μmol/l) kevesebb mint 50%-os csökkenéshez vezetett, erőteljesen azt sugallva, hogy a saját vizsgálati körülményeink között a GSC-k ellenállóak a CIS-kezeléssel szemben (3A ábra).

**Az NSC proliferációját a CIS csak nagyon alacsony dózisban befolyásolta, míg a GSC osztódására, függetlenül a dózistól, nem volt hatással.** A CIS-kezelés nagyon alacsony dózisban (0,1–0,2 μmol/l) jelentősen emelte az NSC proliferációs arányt három nappal a kezelés után, az arány tízszer

magasabb volt, mint a nem kezelt sejtek esetén. Azonban az alacsony dózisú CIS (0,5 μmol/l) csak 50%-os növekedést eredményezett (3B ábra). A proliferációs arány növekedése ezáltal is időben korlátozott volt: hét nappal a CIS-kezelést követően az NSC proliferációs arány az alap szintre állt vissza (ezzel kapcsolatos adatokat nem közlünk). A CIS mind alacsony, mind magas dózisban minimálisan befolyásolta a GSC-eket, a proliferáció vonatkozásában mérhető különbség nem alakult ki sem a kezelést követő harmadik, sem a hetedik napon (3B ábra).

**Az MLH1 és az MSH2 mismatch repair enzimek génexpressziós szintje az NSC-k és a GSC-k esetén hasonló volt, de az utóbbi esetben maga-**

3. ábra Idegi őssejtek és progenitor sejtek (NSC) érzékenyebbek a cisplatinra (CIS), mint a glióma őssejtszerű sejtek (GSC), és alacsonyabb az ABCG2 multidrog-rezisztencia génexpressziós szintjük, de a két sejttípusban a mismatch repair enzimet kódoló gének szintje hasonló

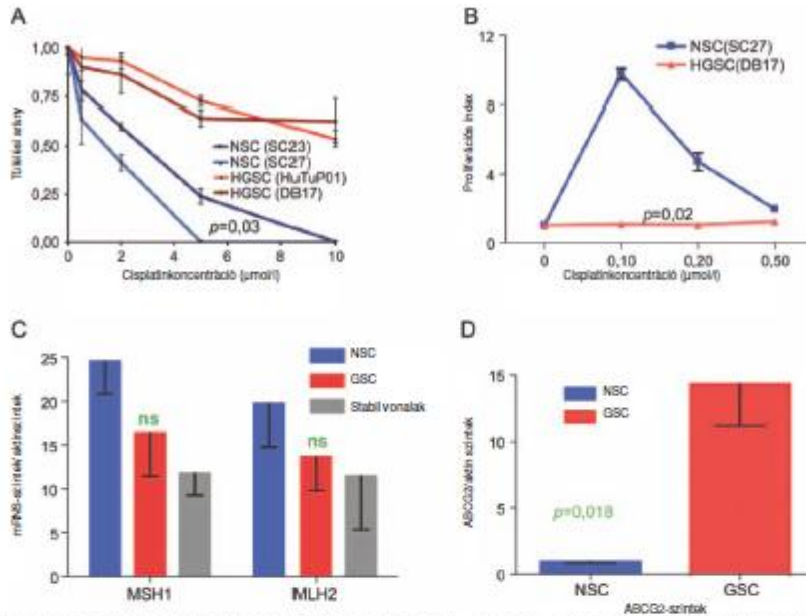

[A] Emelkedő dózisú cisplatinnal történő in vitro kezeléskor NSC-k (SC23, SC27) szűkebb dózistoleranciával rendelkeznek, miközben minimálisan hat a GSC-ekre (HuTu, DB17). [B] Az NSC-k proliferációja erősen inaktívabb, mint a GSC-é, és a cisplatin hatására a GSC-eknél nagyobb mértékben csökken a proliferáció, de a kezelési utáni felépítéskor a GSC-eknél nagyobb mértékben áll vissza (az adatok nem láthatók). [C] Az NSC-eknek és a GSC-eknek hasonló a mismatch repair enzimet kódoló gének (MSH1, MLH2) szintje, ami a cisplatinra (MSH1, MLH2) szerinti rezisztenciájukat befolyásolja. [D] Az NSC-k esetén szignifikánsan alacsonyabb az ABCG2 multidrog-rezisztencia génexpressziója. Az adatok három darab NSC-tenyésztést, 11 darab GSC-tenyésztést és két darab stabil glióma sejtvonal állagából származnak.

sabb volt az ABCG2 multidrog-rezisztencia fe-hérjeszintje. A cisplatinnal szembeni érzékenységet összetett mechanizmusok alakítják ki, beleértve a mismatch repair enzimek (MLH1, MSH2) jelenlétét és a sejtek azon képességét, ami lehetővé teszi a toxikus gyógyszerek elűvölítését (ABCG2). Ezzert három NSC-, 11 GSC-tenyésztésben és két stabil glióma sejtvonalon mérjük az MLH1, az MSH2 szintjét és az ABCG2 expresszióját. Az NSC-eknél magasabb MLH1- és MSH2-expressziós szintet figyelünk meg, mint a stabil vonalaknál ( $p=0,048$ ), de a GSC-k és az NSC-k között nem volt különbség (3C ábra). Ellenben az ABCG2-expresszió szintje a GSC-k esetén tízszer magasabb volt, mint NSC-eknél ( $p=0,018$ ), ami arra utal, hogy a GSC-k NSC-ekhez képest magasabb érzékenységre a CIS- és TMZ-kezelés esetén az érzékenységre, mert a GSC-k hatékonyabban képesek a kemoterápiás gyógyszerek elűvölítésére (3D ábra).

**Az NSC-k kevésbé érzékenyek a proteaszómagatóra, mint a GSC-k.** Annak vizsgálatára, hogy egyéb kemoterápiás szerek képesek-e elpusztítani a GSC-eket az NSC-ek megőrzése mellett, két sejtsort proteaszómagatóval szembeni érzékenységét teszteltük BTZ-vel. Az eredmények azt mutatják, hogy a

GSC-k nagyon érzékenyek a BTZ-re, a 0,5 nmol/l dózis a sejtszám több mint 80%-os csökkenését eredményezte a kezelést követő harmadik napon (4A ábra). Hasonlóan alacsony dózisú BTZ (0,5–1 nmol/l) serkentette az NSC-növekedést, a sejtszám növekedése kétszer-háromszor magasabb volt, mint nem kezelt kontroll esetén, míg az 5 nmol/l dózis minimálisan csökkentette a sejtszámot a kontrolléhoz képest. Az eredményeket két darab NSC-, két darab alacsony grádusú GSC- és négy darab magas grádusú GSC-tenyésztésben is megerősítettük (4B ábra).

**A BTZ GSC-ekben a kaspáz-3 aktivációját eredményezi, míg az NSC-ekre nincs ilyen hatással.** A BTZ-vel kezelt GSC-k számában tapasztalt csökkenés és sejthalál okainak vizsgálatához a kaspáz-3 aktivitását mértük, amely az apoptózis kezdeti fázisainak egyik fontos enzime. A kaspáz-3 myeloma-sejtvonalakban a proteaszómagató toxicitásának fontos mediátora.<sup>29</sup> Az 5 nmol/l BTZ-vel történő kezelés a kaspáz-3 fokozott aktivitásához vezetett, miközben ezt a folyamatot a Z-VAD-FMK kaspáz-3-gátló hozzáadása GSC-ekben hatékonyan csökkentette (4C ábra). A BTZ-vel kezelt NSC-ben nem volt kaspáz-3-indukció, amely arra utal, hogy az NSC-k rezisztensek a proteaszómagatóval szemben.

4. ábra Az idegi őssejtek és progenitor sejtek (NSC) kevésbé érzékenyek a proteaszómagállításra, mint a glioma őssejtűző sejtek (GSC) a magasabb proteaszómaexpresszió, -működés és az alacsonyabb kapapaz-3-aktiváció miatt

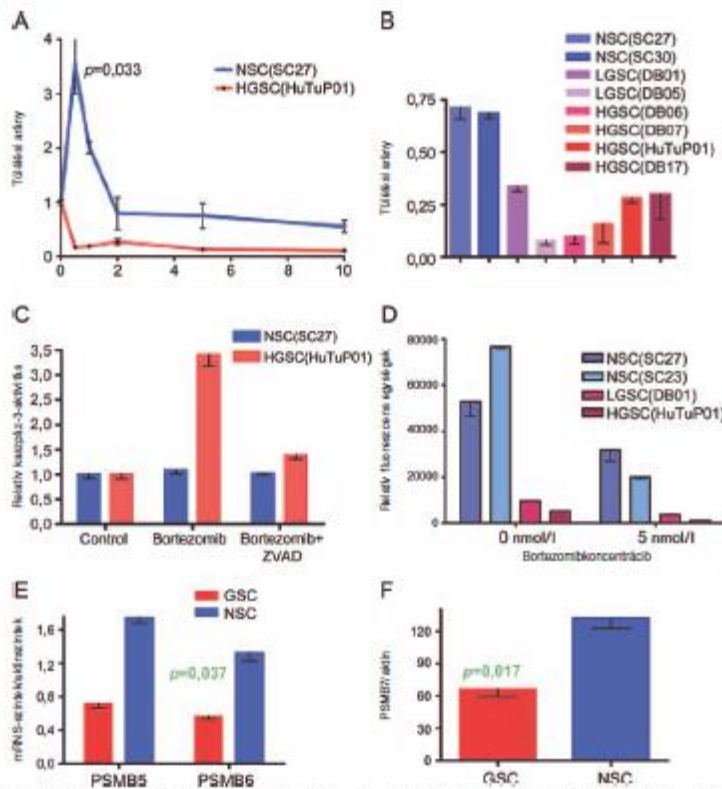

(A) Emelkedő ábrás bortezomib (BTZ) dózist in vitro kezelt elpusztítja a GSC-ket (HuTuP01), miközben minimálisan hat az NSC-re (SC27). (B) 5 nmol/l bortezomibbal történő kezelés az alacsony grádusú (DB01, DB06) és a magas grádusú (DB05, DB07, DB17, HuTu) GSC-k 75-90%-át elpusztította. Ugyanannak a dózisnak NSC-k (SC27 és SC30) esetén kisebb volt a toxicitása. (C) A kapapaz-3-aktivitást sejtkoncentrációban vizsgáltuk, 24 órával a BTZ- (5 nmol/l) és a ZVAD- (50  $\mu$ mol/l) kezelést követően, a megadottaknak megfelelően. GSC-k esetén magasabb volt a kapapaz-3-aktivitás BTZ-kezelést követően, amelyet ZVAD hozzáadása fordított meg, míg NSC-k esetén a kapapaz-3-szintje BTZ-kezelést követően nem változott. (D) A proteaszómaaktivitást sejtkoncentrációban mérők a kezelt sejtek és négy órával a BTZ- (2 nmol/l) kezelt után. Az NSC-k esetén magasabb volt a kezelt proteaszómaaktivitás, mint GSC-k esetén, amely proteaszómagátló adását követően is magasabb maradt, mint a GSC-szint. (E, F) NSC-kben a PSMB5, PSMB6 és a PSMB7 proteaszóma-egységek szignifikánsan magasabb szinten expresszálódtak. Az adatok három darab NSC-tenyésztés, 11 darab GSC-tenyésztés és két darab stabil gliomasajtvonal átlagából származnak.

Az NSC-kben magasabb a proteaszómaaktivitás, a PSMB5-, PSMB6- és PSMB7-szint, mint a GSC-kben. A BTZ-vel szembeni rezisztenciáért felelős celluláris faktorokat intenzíven kutatják, számos tényező felfedeztek már, úgy mint a rezisztens sejtekben jelen lévő emelkedett proteaszómaaktivitás és a proteaszóma alegységeinek, különösen a PSMB5-nek a mutációja/overexpressziója.<sup>30</sup> Azt tapasztaljuk, hogy az NSC-kben öt-hétszer magasabb a proteaszóma kintotripszinszerű alaktivitása, mint az alacsony vagy magas grádusú GSC-kben. Továbbá, hogy NSC-kben a BTZ indukálta proteaszómagátlást követően is magas volt a proteaszómaaktivitás (maximum tízszer magasabb, mint a kezelt GSC-k esetén; 4D ábra). A PSMB5, PSMB6 és PSMB7 szintjét három darab NSC- és 11 darab alacsony és magas grádusú gliomából származó GSC-tenyésztésen mértük. Átlagban

mindhárom alegység szintje magasabb volt NSC-k esetén, mint a GSC-kenél, összhangban a magasabb proteaszóma funkcionális aktivitással (4E és F ábra).

Az EGFR-pálya gátlása ERL-lel kedvezően befolyásolja a GSC-eket és összefügg az EGFR-expresszióval. Az EGFR tirozinkináz-gátló ERL-1 szüles körében vizsgáltuk, mint a glioma esetleges célzott kezelési lehetőségé.<sup>15,12</sup> A mi kísérletünkben sem az alacsony (2  $\mu$ mol/l), sem a magas (10  $\mu$ mol/l) dózisú ERL nem volt hatással a túlélő NSC-k számára, de mindkettő maximum 50%-kal csökkentette a GSC-k számát (5A ábra). Az ERL-re adott válasz összhangban áll az immunhisztokémiai reakciókon megfigyelt EGFR-expresszióval: a GSC-kben egyenesen magas volt az EGFR expressziója, míg NSC-kben csak elszórtan, kismértékben expresszálódtak (5B ábra).

5. ábra Az EGFR-pálya erőltetve történő gátlása különösen a glioma őssejtsejtekre (GSC) hat és összefüggésben áll az EGFR-expresszióval

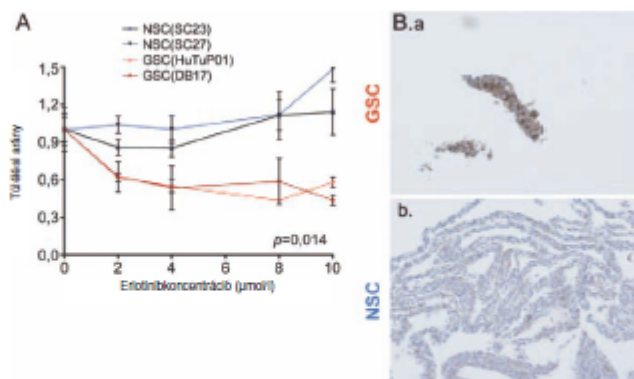

(A) Emelkedő dózisú ERL-ét történő in vitro kezelés a GSC-k (HuTu, DB17) számának csökkenéséhez vezetett, míg minimális hatása volt az idegi őssejtekre és progenitor sejtekre (NSC) (SG23, SG27). (B.a) A GSC-k környezetben pozitívan festődtek EGFR-re, miközben (B.b) az NSC-k kevésbé mértékű, spontánisan expresszó jelölést (három darab NSC és öt darab GSC-kégykezelést készítettünk, a reprezentatív eredmények láthatók).

**MEGBESZÉLÉS** A kemoterápia NSC túlélésére kifejtett hatásai a vizsgált terápia típusától függenek (e-3 táblázat). A DNS-t célzó gyógyszerek, azaz a TMZ és a CIS, nagymértékben és specifikusan pusztítják az NSC-eket a GSC-ekkel szemben. Ez az NSC-k számában jelentkező csökkenés (az általunk létrehozott vizsgálati körülmények között a CIS hatékonyan pusztítja az NSC-eket) magyarázhatja az agytumoros betegeknél megfigyelt kognitív hanyatlást e gyógyszerekkel történő kezelést követően. Sajnos, sem a TMZ, sem a CIS nem pusztítja el hatékonyan a GSC-eket, összhangban korábbi vizsgálatokkal, amelyekben a GSC-k rezisztensnek bizonyultak a kemoterápiával<sup>20</sup> szemben, ami magyarázhatja a túlélésnek, a kezelés ellenére megfigyelt kisebb mértékű növekedését.<sup>21</sup>

A TMZ- és CIS-kezeléssel szemben (amely egyenlő mértékben célozza meg a daganatos és az egészséges sejtekben található DNS-t) a proteaszómagító BTZ toxikusabb a GSC-ekre, a GSC-kben található proteaszóma viszonylag alacsony funkcionális szintje miatt. Ez a gyógyszer akár alacsony koncentrációban is elpusztítja a GSC-eket. Habár a BTZ kis mennyiségben képes csak bejutni a központi idegrendszerbe, ezek az adatok magyarázhatják, miért hatásos a BTZ medulloblastomás egérmodellek daganatainak térfogatcsökkentésére<sup>22</sup> és fizis I vizsgálatokban a visszatérő, rosszindulatú glioma kezelésére.<sup>23</sup>

A rosszindulatú gliomákra EGFR-overexpresszió jellemző, amely a magas grádusú tumorok 40–60%-ában fordul elő.<sup>24</sup> Mivel az ERL is fehérjeszintet hat, azáltal, hogy specifikusan a receptor foszforilációs részéhez kötődik és gátolja az EGFR autoaktivációját, az ERL-kezelés nem csökkenti az NSC-k számát, de képes a GSC-ekre hatni (bár nem nagy hatékony-

sággal). Ennek az lehet az oka, hogy az NSC-k felszínén az EGFR csak bizonyos fejlődési stádiumban található meg,<sup>25</sup> míg a GSC-k felszínén állandóan jelen van.

Az agyi rosszindulatú daganatok kezelésében használt sugár- és kemoterápia a túlélőknel gyakran tanulási és memóriabeli zavarokhoz vezet.<sup>23</sup> A sugárkezelés csökkenti a hippocampalis neurogenesiset,<sup>26</sup> amely relatív sokrétű kognitív hanyatláshoz vezet, több kognitív funkcióért felelős területet érintve.<sup>27</sup> A kemoterápiás szerek kognitív hatásait, a sugárkezeléstől elkülönítve, nehezebb felmérni, mert az agydaganatos betegek többsége rendszerint mindkét kezelési típusban részesül, és a betegség különböző stádiumaiban egyszeres vagy összetett kemoterápiás készítményeket használ. Azonban elsődleges központi idegrendszeri lymphómában szenvedő felnőtt betegeknél, akik sugárkezelés nélkül részesültek kemoterápiában (nagy dózisú metotrexát), az összpontosításban, tanulásban és a memóriában szintén hanyatlást lehetett megfigyelni. Ez a hanyatlás kifejezettebb, mint a kemoterápiában részesülő emlődaganatos vagy szisztémás lymphómában szenvedő betegeknél.<sup>3</sup> A kemoterápia késői mellékhatásai (akár sugárkezelés nélkül is) a gyermekkori agydaganatok esetén elhúzódóak és súlyosak, számos esetben fejlődésbeli visszamaradottság észlelhető.<sup>28</sup> Mivel a gyermekkori betegek is kapnak cisplatin vagy karboplatin,<sup>28</sup> fontos tudni, hogy ezek a szerek erőteljes NSC-pusztuláshoz vezetnek, ami magyarázhatja a betegek nagyfokú kognitív hanyatlását.

Az adataink magyarázatot adhatnak arra, hogy a rosszindulatú gliomák miért reagálnak egy ideig a kezelésre, majd miért újulnak ki. Újjonnan diagnosztizált GBM-ben szenvedő, kombinált sugár- és TMZ-

kezelésben részesülő betegek öt éves utánkövetése után azt tapasztaltuk, hogy a betegeknek csak kevesebb mint 10%-a élt ekkor.<sup>39</sup> Ha a GSC-k ellenállóak a TMZ-vel szemben, a GSC-k folyamatosan megújítják a tumort utódsejteket létrehozva, amelyek szintén TMZ-rezisztensek lesznek. Mivel az ERL és a BTZ a GSC-k ellen sokkal hatásosabbnak tűnik, ezek a szerek lehetnek a jövőbeli klinikai vizsgálatok célpontjai, mint fenntartó terápiás lehetőségek a TMZ-kezelést követően. Azonban a GSC ellen leg-hatásosabb szer, a BTZ, csak korlátozottan jut be az agyba és jelentős a szisztémás toxicitása, így előnyös lenne új proteasómagátók kifejlesztése. Mivel azonban az ERL nincs hatással az NSC-kre, a GSC-k túlélését 50%-kal csökkenti. Ez az eredmény alátámaszthatja azokat a klinikai adatokat, amelyek szerint az ERL-nek önmagában alkalmazva nagyon korlátozott a klinikai aktivitása.<sup>40</sup> Egyéb magyarázat lehet még, hogy a szer nem jut be megfelelően a tumorba és esetleg jobban differenciál, prekursorsejterű gliomasejtek alakulnak ki, amelyek ellenállóak az EGFR-gátlással szemben.

A betegek gyakran évekig kemoterápiás kezelést kapnak kombinálva egyéb DNS-t célzó terápiával. Habár klinikailag a remisszió elérésére (és az esetleges gyógyulásra) kellene fektetni a hangsúlyt, a túlélők életminőségének megtartása a hosszú távú mellékhatások elkerülésével szintén fontos cél. Az olyan szerek használata, amelyek elpusztítják a legagresszívebb glioma összejterű sejteket, de megőrzik az idegi őssejt és progenitor sejt populációkat és az agy képlékenységet, elérhetőbbé teheti ezt a célt.

## KÖSZÖNETNYILVÁNÍTÁS

A szerzők kizárólagos felelőseik ki dr. Richard Kimnek a minták neuropatológiai vizsgálatáért, Kelsey Albertnek (MS) és a Zelen Research cégnek a technikai segítségért, dr. Tallei Z. Barannak a kizárólagos magyarázatot nyújtó tanácsaiért. Az immunocitokémia az Irvine-i Kaliforniai Egyetemen található Pathology Services Core segítségével végeztük.

## ÉRDEKELTSÉGEK

Dr. Gong ostón érdekeltség nem áll fenn. Dr. Schwartz a Children's Hospital of Orange County (CHOC), a CHOC Foundation for Children, Autism Speaks és az NIH intézményektől kapott kutatási támogatást. Dr. Linsley egy tudományos szakbizottsági tagja és az Epitopeotic Research Corporationtól utazási támogatást kapott; a YNA—The Facial Pain Association orvosi szakértői csapatának tagja és megbízott vezetője; a *Journal of Neurology* szerkesztőbizottsági tagja; szabadalommal rendelkezik a folyamatban lévő endovascularis optikai koherencia tomográfia kóreljárásról kapcsolatban és kutatási támogatást kapott egy adományozó betegől. Dr. Bota az Epitopeotic Research Corporation tudományos tanácsadó testületének tagja; a Merck Serono, Roche és az Eisai Inc. cégek előadó-kivételű irodáinak tagja; a *Cancer Growth and Metastasis* és a *Clinical Medicine Reviews in Oncology* szerkesztői tanácsadó testületének tagja és kutatási támogatást kapott az American Cancer Societytől.

*Beérkezett 2010. május 20-án. Elfogadva végleges formában 2010. október 15-én.*

## IRODALOM

- 2010 CEBRUS Statistical Report: Primary brain and central nervous system tumors diagnosed in the United States in 2004–2006. In: Central Brain Tumor Registry of the United States. Available at: <http://www.cbtrus.org/reports/reports.html>. Accessed March 2010.
- Schmidinger M, Linemayer I, Becherer A, et al. Psychometric and quality-of-life assessments in long-term glioblastoma survivors. *J Neurooncol* 2003;63:55–61.
- Imperato JP, Paleologos NA, Vick NA. Effects of treatment on long-term survivors with malignant astrocytomas. *Ann Neurol* 1990;28:818–822.
- Corn BW, Wang M, Fox S, et al. Health related quality of life and cognitive status in patients with glioblastoma multiforme receiving escalating doses of conformal three dimensional radiation on RTOG 98-03. *J Neurooncol* 2009;95:247–257.
- Ahles TA, Saykin AJ, Fursenberg CF, et al. Neuropsychologic impacts of standard-dose systemic chemotherapy in long-term survivors of breast cancer and lymphoma. *J Clin Oncol* 2002;20:485–493.
- Armand JP, Macques JP, LeRoy AF. Cerebrospinal fluid platinum kinetics of cisplatin in man. *Cancer Treat Res* 1983;67:1035–1037.
- Ossemann S, Cojta C, Budin Y, et al. Plasma and cerebrospinal fluid population pharmacokinetics of temozolomide in malignant glioma patients. *Clin Cancer Res* 2004; 10:3728–3736.
- Hegb ME, Diserens AC, Gotlia Y, et al. MGMT gene silencing and benefit from temozolomide in glioblastoma. *N Engl J Med* 2005;352:997–1003.
- Karalou M, Essigmann JM. Mechanisms of resistance to cisplatin. *Mutat Res* 2001;478:23–43.
- Diestra JJ, Scheffer GL, Catalá I, et al. Frequent expression of the multi-drug resistance-associated protein BCRP/ MXR/ABCP/ABCG2 in human tumours detected by the BXP-21 monoclonal antibody in paraffin-embedded material. *J Pathol* 2002;198:213–219.
- Haas-Kogan DA, Prados MD, Yihan Y, et al. Epidermal growth factor receptor, protein kinase B/Akt, and glioma response to erlotinib. *J Natl Cancer Inst* 2005; 97:880–887.
- Rich JN, Reardon DA, Peery Y, et al. Phase II trial of gefitinib in recurrent glioblastoma. *J Clin Oncol* 2004;22: 133–142.
- Gregory JK, Maria W-W, Mitchell M, et al. Phase I trial using proteasome inhibitor bortezomib and concurrent temozolomide and radiotherapy for central nervous system malignancies. *Int J Radiat Oncol Biol Phys* 2009;74: 433–439.
- Yin D, Zhou H, Kumagai T, et al. Proteasome inhibitor PS-341 causes cell growth arrest and apoptosis in human glioblastoma multiforme (GBM). *Oncogene* 2004;24: 344–354.
- Sarkaria JN, Carlson BL, Schroeder MA, et al. Use of an orthotopic xenograft model for assessing the effects of epidermal growth factor receptor amplification on glioblastoma radiation response. *Clin Cancer Res* 2006;12: 2264–2271.
- Bao S, Wu Q, Sahoromsumsee S, et al. Stem cell-like glioma cells promote tumor angiogenesis through vascular endothelial growth factor. *Cancer Res* 2006;66: 7843–7848.
- Singh SK, Clarke ID, Yerasaki M, et al. Identification of a cancer stem cell in human brain tumors. *Cancer Res* 2003; 63:5821–5828.
- Singh SK, Hawkins C, Clarke ID, et al. Identification of human brain tumour initiating cells. *Nature* 2004;432: 396–401.



19. Bao S, Wu Q, McLendon RE, et al. Glioma stem cells promote radioresistance by preferential activation of the DNA damage response. *Nature* 2006;444:756–760.
20. Liu G, Yuan X, Zeng Z, et al. Analysis of gene expression and chemoresistance of CD133+ cancer stem cells in glioblastoma. *Molecular Cancer* 2006;5:67.
21. Reynolds B, Weiss S. Generation of neurons and astrocytes from isolated cells of the adult mammalian central nervous system. *Science* 1992;255:1707–1710.
22. Saxe MD, Basaglia F, Wang J-W, et al. Ablation of hippocampal neurogenesis impairs contextual fear conditioning and synaptic plasticity in the dentate gyrus. *Proc Natl Acad Sci* 2006;103:17501–17506.
23. Truche SP, Bonempi B, Roulet P, Rampon C. Recruitment of adult-generated neurons into functional hippocampal networks contributes to updating and strengthening of spatial memory. *Proc Natl Acad Sci* 2009;106:5919–5924.
24. Monje M, Maumasi S, Fike JR, Palmer TD. Irradiation induces neural precursor-cell dysfunction. *Nat Med* 2002;8:955–962.
25. Seigers R, Schagen SH, Beerling W, et al. Long-lasting suppression of hippocampal cell proliferation and impaired cognitive performance by neurosteroids in the rat. *Behav Brain Res* 2008;186:168–175.
26. Schwanz PH, Bryan PJ, Fuja TJ, Su H, O'Dowd DK, Klassen H. Isolation and characterization of neural progenitor cells from post-mortem human cortex. *J Neurosci Res* 2003;74:838–851.
27. Pisollaro F, Chen H-L, Rood BR, et al. Hypoxia and HIF1alpha repress the differentiative effects of BMPs in high-grade glioma. *Stem Cells* 2009;27:7–17.
28. Compston T, Peisch MC, MacDonald HR, Tschopp J. Propidium iodide staining correlates with the extent of DNA degradation in isolated nuclei. *Biochem Biophys Res Commun* 1992;183:532–537.
29. Bi M, Iida S, Nakashima T, et al. Bone-marrow-resistance myeloma cell lines: a role for mutated PSMB5 in preventing the accumulation of unfolded proteins and basal ER stress. *Leukemia* 2010;24:1506–1512.
30. Oerlemans R, Franke NE, Assaraf YG, et al. Molecular basis of bortezomib resistance: proteasome subunit 5 (PSMB5) gene mutation and overexpression of PSMB5 protein. *Blood* 2008;112:2489–2499.
31. Suupp R, Mason WP, van den Bent MJ, et al. Radiotherapy plus concomitant and adjuvant temozolomide for glioblastoma. *N Engl J Med* 2005;352:987–996.
32. Samano A, Ohshima-Hosoyama S, Whitney T, et al. Functional evaluation of therapeutic response for a mouse model of medulloblastoma. *Transgenic Res* 2010;19:829–840.
33. Phuphanich S, Supko J, Carson K, et al. Phase 1 clinical trial of bortezomib in adults with recurrent malignant glioma. *J Neuro-Oncol Epub* 2010 Mar 8.
34. Frederick I, Wang XY, Eley G, James CD. Diversity and frequency of epidermal growth factor receptor mutations in human glioblastomas. *Cancer Res* 2000;60:1383–1387.
35. Burnows RC, Wancio D, Lewis P, Lallien L. Response diversity and the timing of progenitor cell maturation are regulated by developmental changes in EGFR expression in the cortex. *Neuron* 1997;19:251–267.
36. Monje M. Cranial radiation therapy and damage to hippocampal neurogenesis. *Dev Disabil Res Rev* 2008;14:238–242.
37. Correa DD, DeAngelis LM, Shi W, Thaler H, Glass A, Abrey LE. Cognitive functions in survivors of primary central nervous system lymphoma. *Neurology* 2004;62:548–555.
38. Nomura Y, Yasumoto S, Yanai F, et al. Survival and late effects on development of patients with infantile brain tumor. *Pediatr Int* 2009;51:337–341.
39. Suupp R, Hegi ME, Mason WP, et al. Effects of radiotherapy with concomitant and adjuvant temozolomide versus radiotherapy alone on survival in glioblastoma in a randomised phase III study: 5-year analysis of the EORTC-NCIC trial. *Lancet Oncol* 2009;10:459–466.
40. van den Bent MJ, Brandes AA, Rampling R, et al. Randomised phase II trial of etoposide versus temozolomide or carmustine in recurrent glioblastoma: EORTC Brain Tumor Group Study 26034. *J Clin Oncol* 2009;27:1268–1274.
